# Supplementary material for: Binding of Staphylococcal Enterotoxin B (SEB) to B7 Receptors Triggers TCR- and CD28-Mediated Inflammatory Signals in the Absence of MHC Class II Molecules
Source: PubMed Central journal article supplement (PMC8418141; doi:10.3389/fimmu.2021.723689), 2021-08-13
Supplement: Image_1.pdf [file Image_1.pdf]

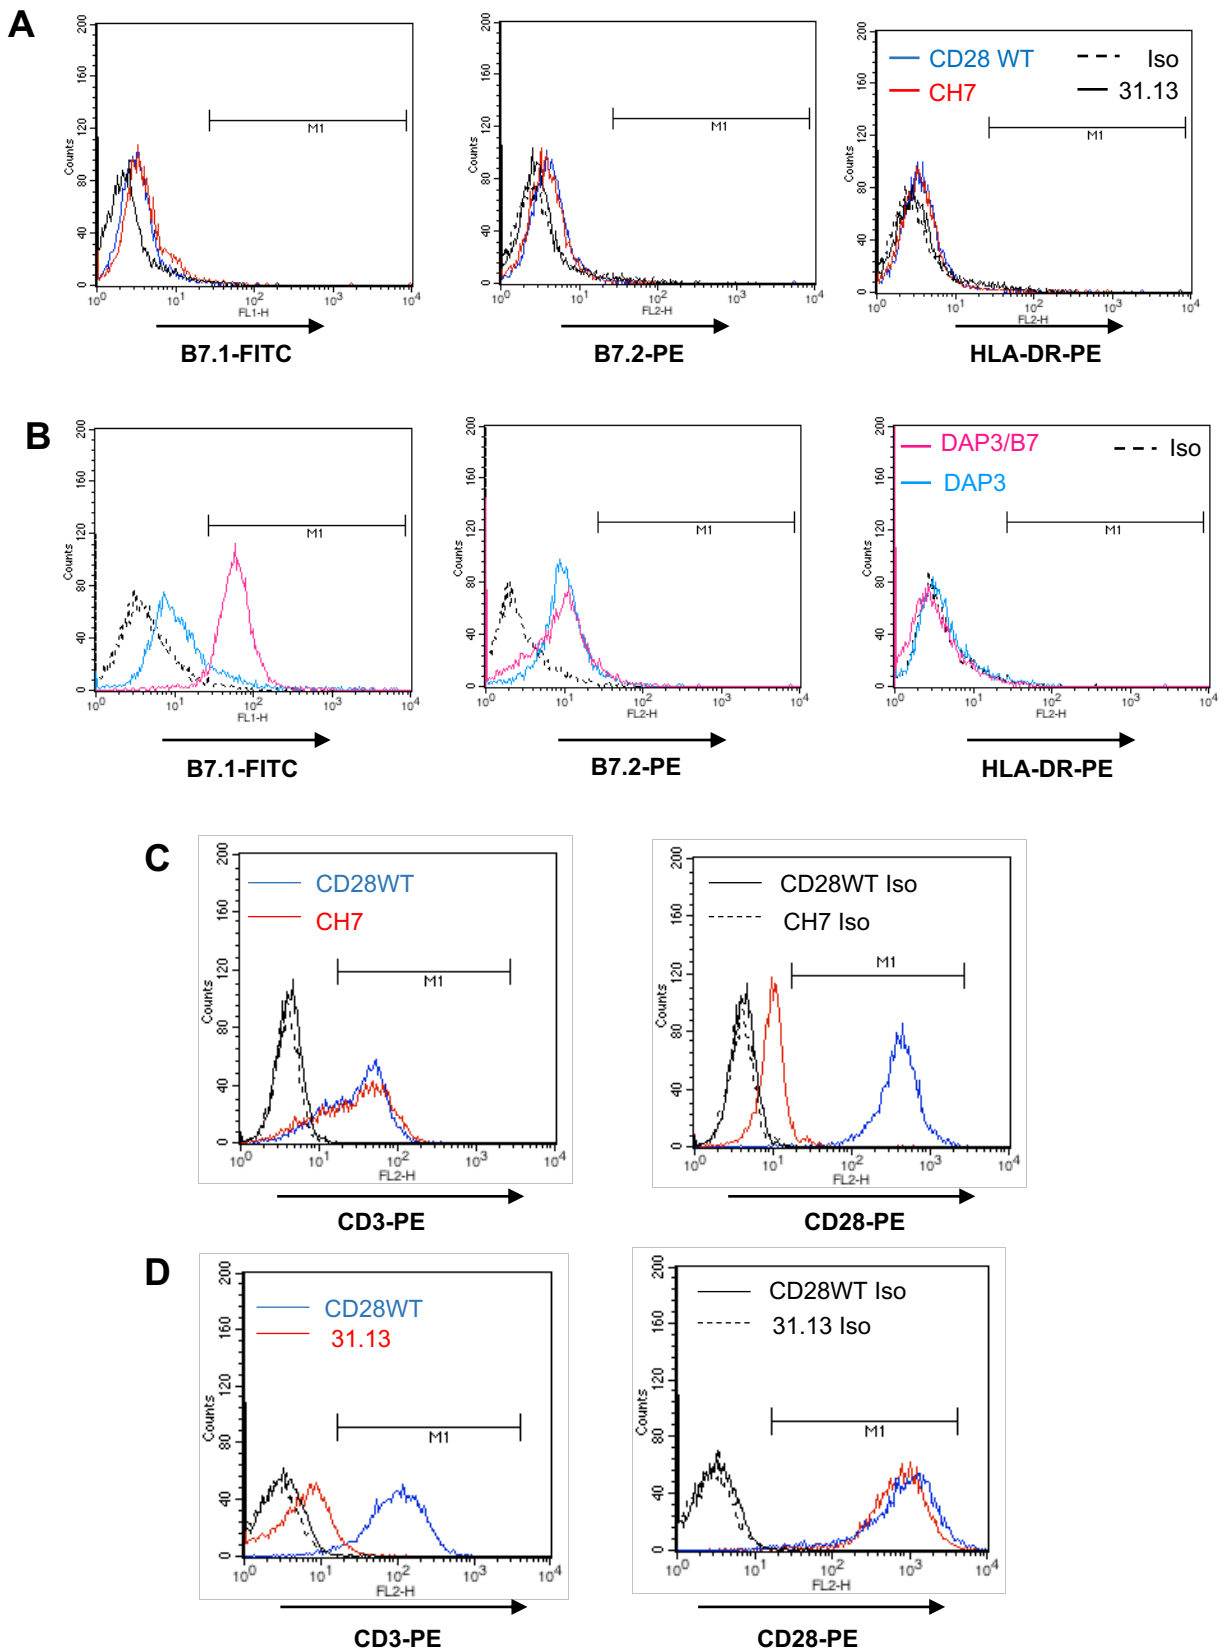

**Figure S1. Phenotypic analysis of Jurkat T cell lines and murine L cells. (A-D)** FACS analysis of B7.1, B7.2, HLA-DR (A, B), CD3 and CD28 (C, D) in CD28WT, CH7 and 31.13 cells or (A, C, D) or Dap3 and Dap3/B7 (B). Iso = isotype control Abs.
