# Supplementary material for: Binding of Staphylococcal Enterotoxin B (SEB) to B7 Receptors Triggers TCR- and CD28-Mediated Inflammatory Signals in the Absence of MHC Class II Molecules
Source: Front Immunol. 2021 Aug 13;12:723689. doi: 10.3389/fimmu.2021.723689 (PMC8418141; doi:10.3389/fimmu.2021.723689)
Supplement: Supplementary file 3 [file Image_3.pdf]

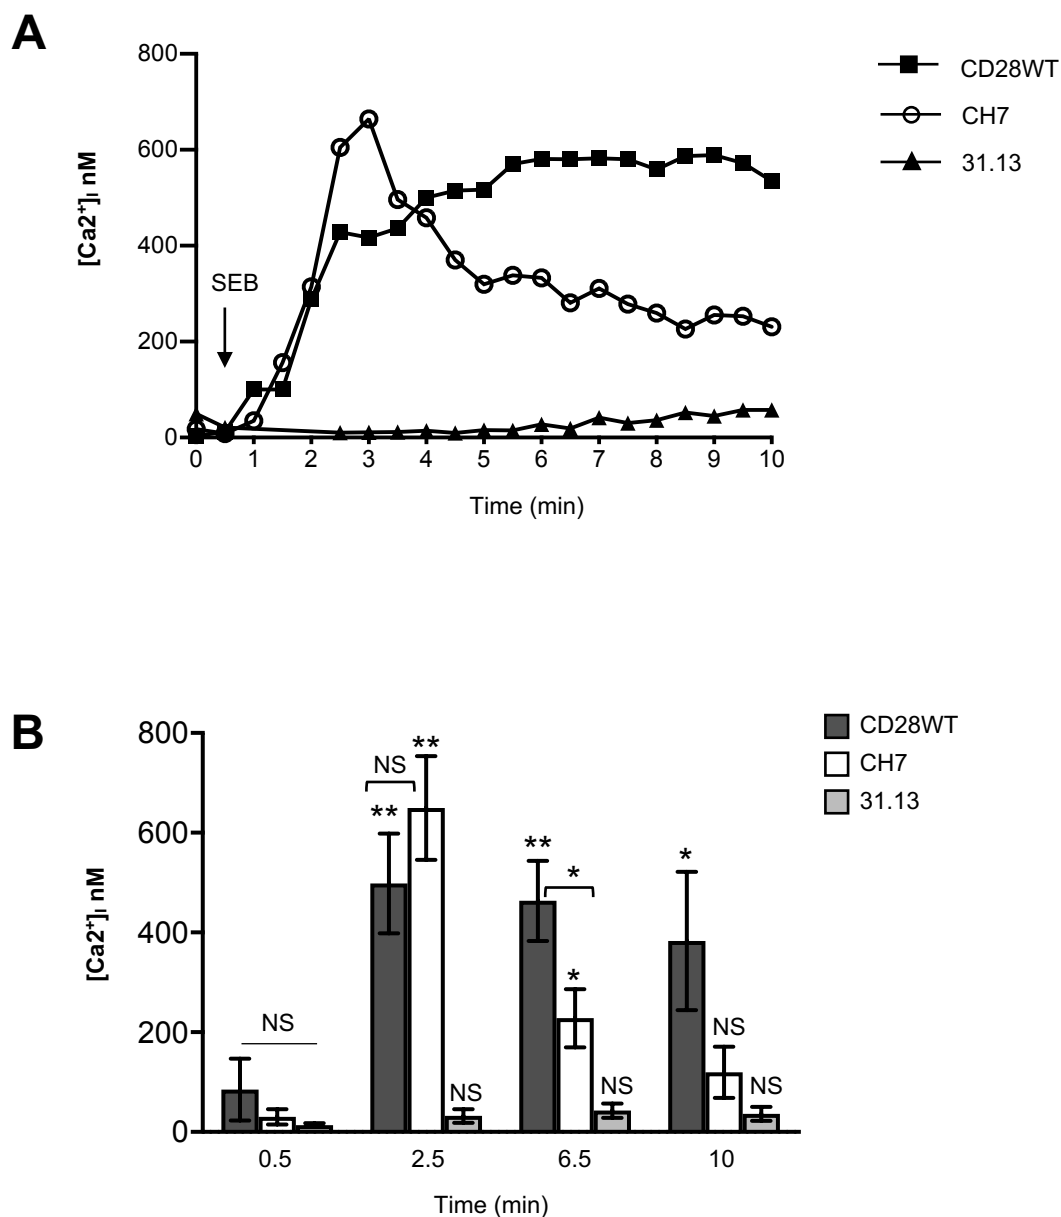

**Figure S3. CD28 sustains SEB-induced calcium influx. (A, B)** CD28WT, CH7 or 31.13 cells were loaded with Fluo-3-AM and then stimulated with  $1 \mu\text{g ml}^{-1}$  SEB. Changes in  $\text{Ca}^{2+}$  levels ( $[Ca^{2+}]_i$ ) were analysed by FACS every 30 s for 10 min by measuring the fluorescence emission in FL-1 channel. Data (A) are representative of three independent experiments. Bars (B) show the mean  $[Ca^{2+}]_i \pm \text{SEM}$  of three independent experiments at the indicated time points. Statistical significance was calculated by Student's t test.
